# Supplementary material for: Reversible colorless-cyan photochromism in Eu2+-doped Sr3YNa(PO4)3F powders
Source: Royal Society of Chemistry journal article supplement (doi:10.1039/c5tc01797a), 2015-01-01
Supplement: c5tc01797a1.pdf [file c5tc01797a1.pdf]

**Supplementary Information**

**Reversible colorless-cyan photochromism in  $\text{Eu}^{2+}$ -doped  $\text{Sr}_3\text{YNa}(\text{PO}_4)_3\text{F}$   
powders**

Yahong Jin, Yihua Hu\*, Yinrong Fu, Li Chen, Guifang Ju and Zhongfei Mu  
School of Physics and Optoelectronic Engineering, Guangdong University of  
Technology, WaiHuan Xi Road, No.100, Guangzhou 510006, PR China

Table S1. Refined structure parameters of SYNPF derived from the Rietveld refinement of X-ray diffraction data.

| Atom | Wyckoff position | x      | y      | z      | Frac   |
|------|------------------|--------|--------|--------|--------|
| Y    | 2d               | 0.3333 | 0.6667 | 0.5007 | 1.0000 |
| Na   | 2d               | 0.3333 | 0.6667 | 0.0119 | 1.0000 |
| Sr   | 6g               | 0.2415 | 0.2552 | 0.2526 | 1.0000 |
| P    | 6g               | 0.3665 | 0.3995 | 0.7423 | 1.0000 |
| O1   | 6g               | 0.4817 | 0.3329 | 0.7957 | 1.0000 |
| O2   | 6g               | 0.4392 | 0.5677 | 0.7792 | 1.0000 |
| O3   | 6g               | 0.2587 | 0.3365 | 0.9190 | 1.0000 |
| O4   | 6g               | 0.2508 | 0.3349 | 0.5806 | 1.0000 |
| F    | 2c               | 0.0000 | 0.0000 | 0.2202 | 1.0000 |

Cell parameters: a=b=9.627241 Å, c=7.133053 Å, V=572.545 Å<sup>3</sup>, Z=2; space group: *P*-3(no.147); Reliability factors: R<sub>wp</sub>=3.97%, R<sub>p</sub>=2.74% and  $\chi^2=2.98$

Table S2. Chemical composition of the SYNPF:0.005Eu<sup>2+</sup> sample by XRF analysis.

| Chemical composition | Sr                                                                        | Y       | P       | Na     | Eu     | F      |
|----------------------|---------------------------------------------------------------------------|---------|---------|--------|--------|--------|
| Mass(wt%)            | 53.6082                                                                   | 17.1567 | 18.7629 | 4.3299 | 0.1651 | 4.1237 |
| Molar ratio          | n(Sr):n(Y):n(P):n(Na):n(Eu):n(F)=3.2485:1.0246:3.2167:1.000:0.0058:1.1521 |         |         |        |        |        |

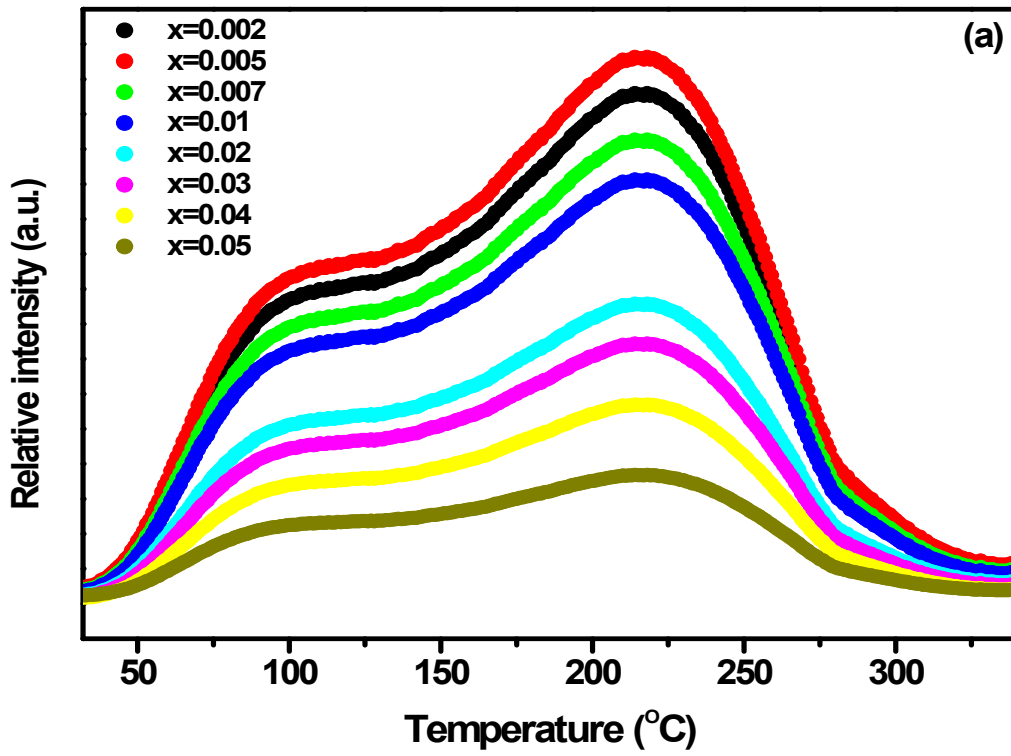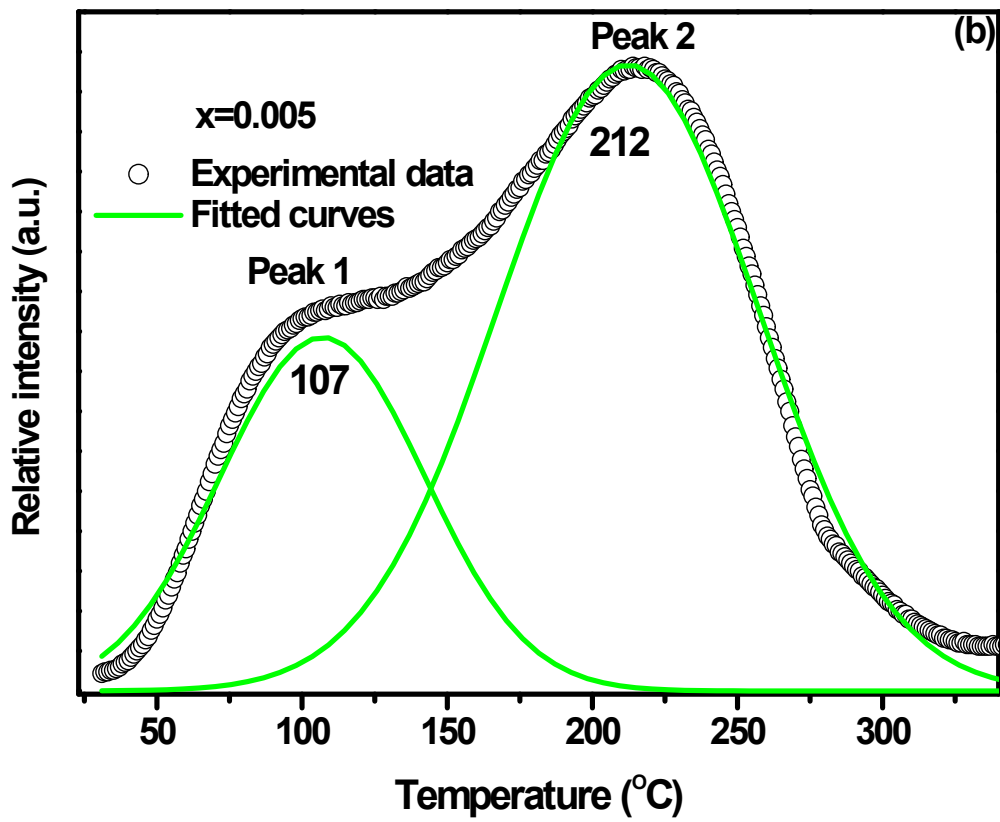

Fig. S1 (a) TL glow curves of SYNPF:xEu<sup>2+</sup> (x=0.002-0.05) after irradiated by 254 nm

for 5 min with delay 5 min time; (b) Experimental data of SYNPF:0.005Eu<sup>2+</sup> (black dots) and deconvoluted two peaks (green curves) based on Gaussian function.

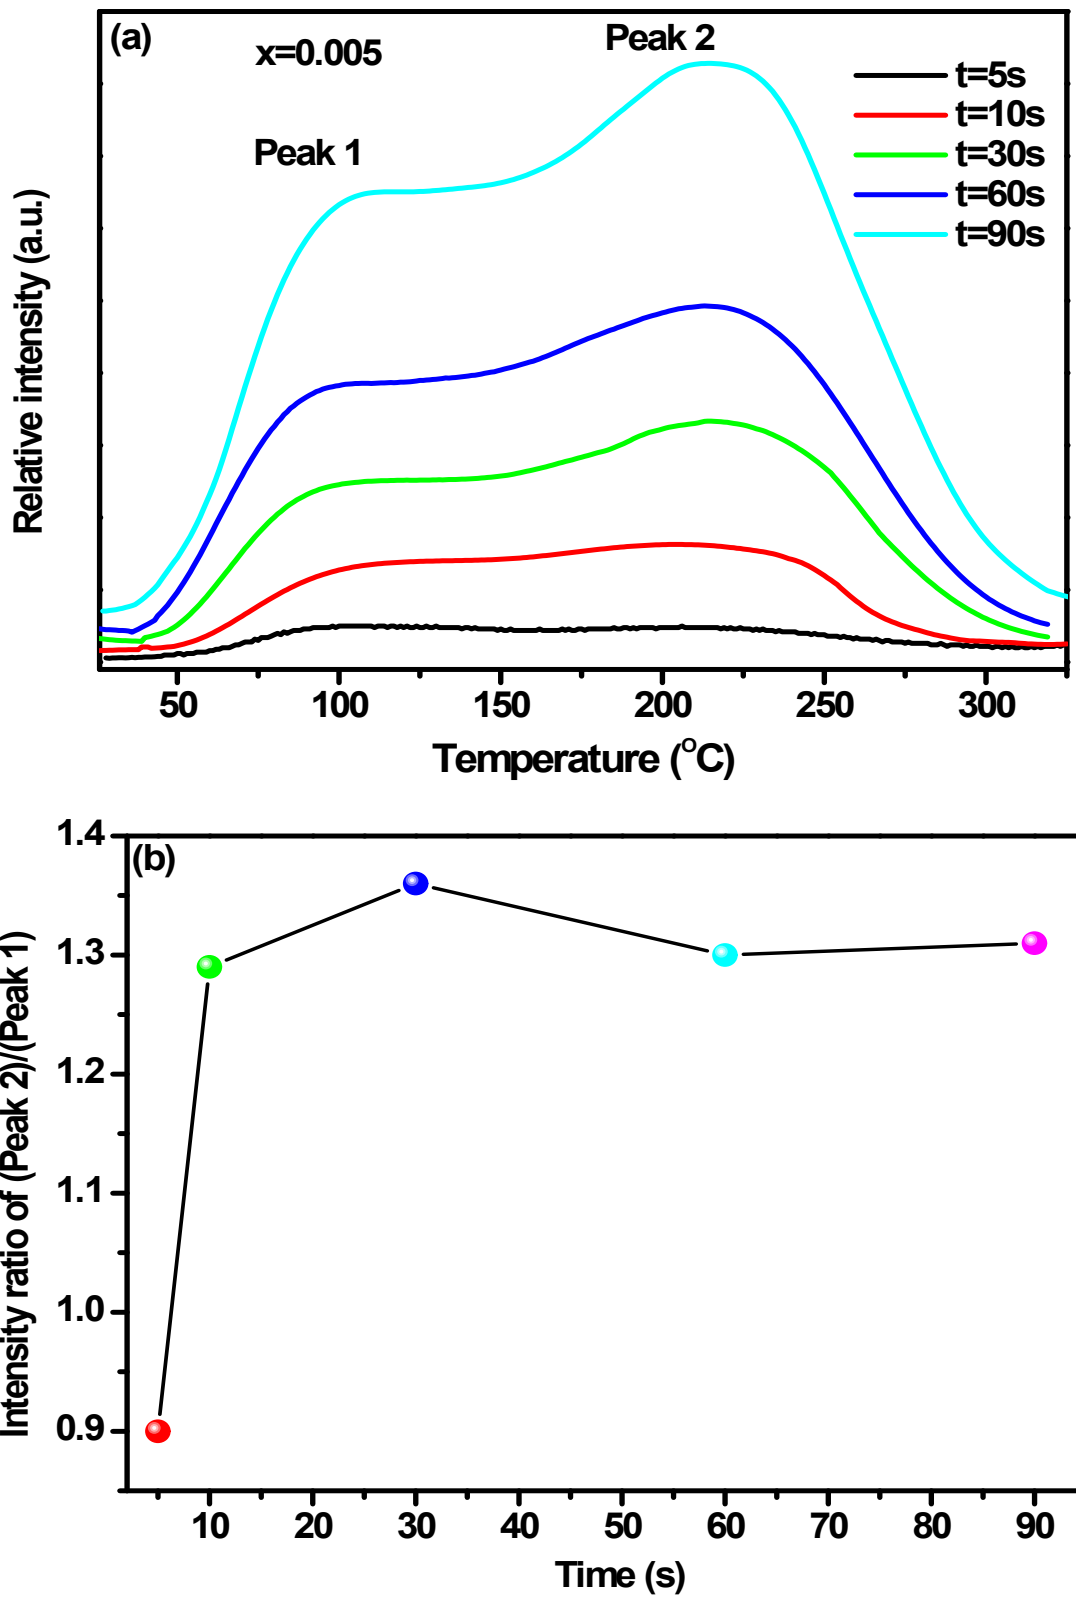

Fig. S2 (a) TL glow curves of SYNPF:0.005Eu<sup>2+</sup> after irradiated by 254 nm for different dwell times (t=5-90 s); (b) Intensity ratio of [(Peak 2)/(Peak 1)] as a function of irradiation

(254 nm) time.

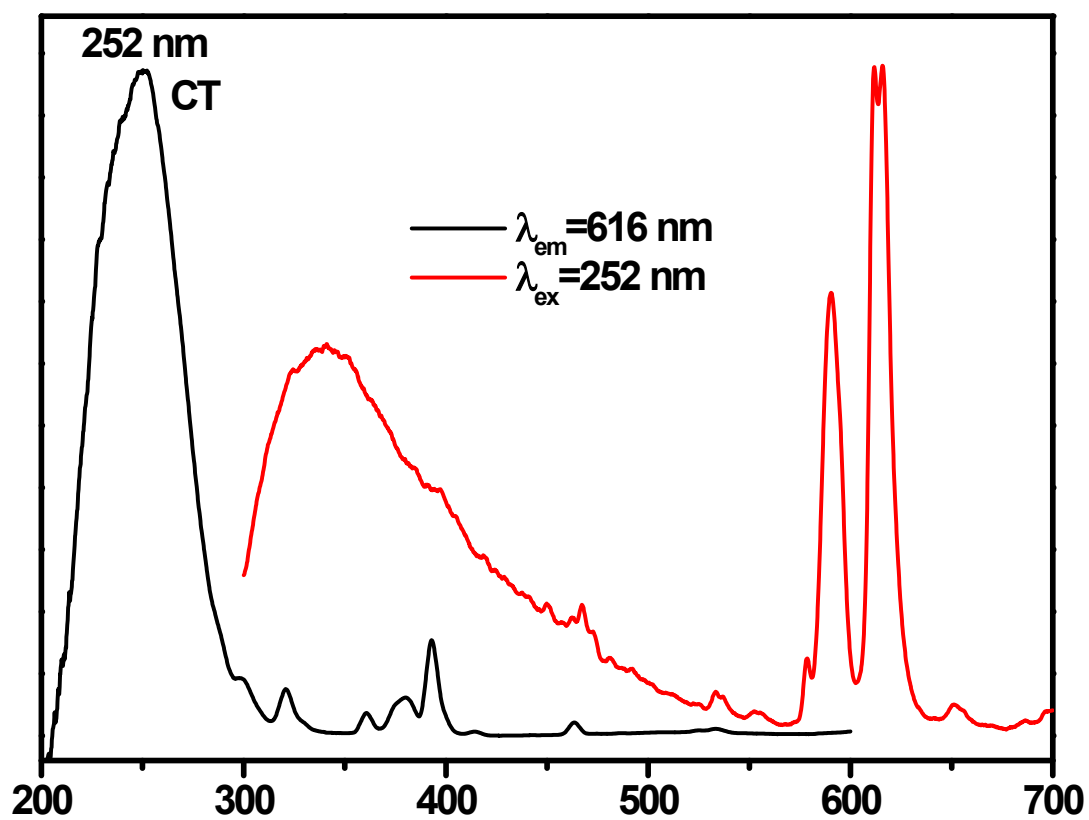

Fig. S3 Excitation ( $\lambda_{em}=616$  nm) and emission ( $\lambda_{ex}=252$  nm) spectra of SYNPF:Eu<sup>3+</sup>;

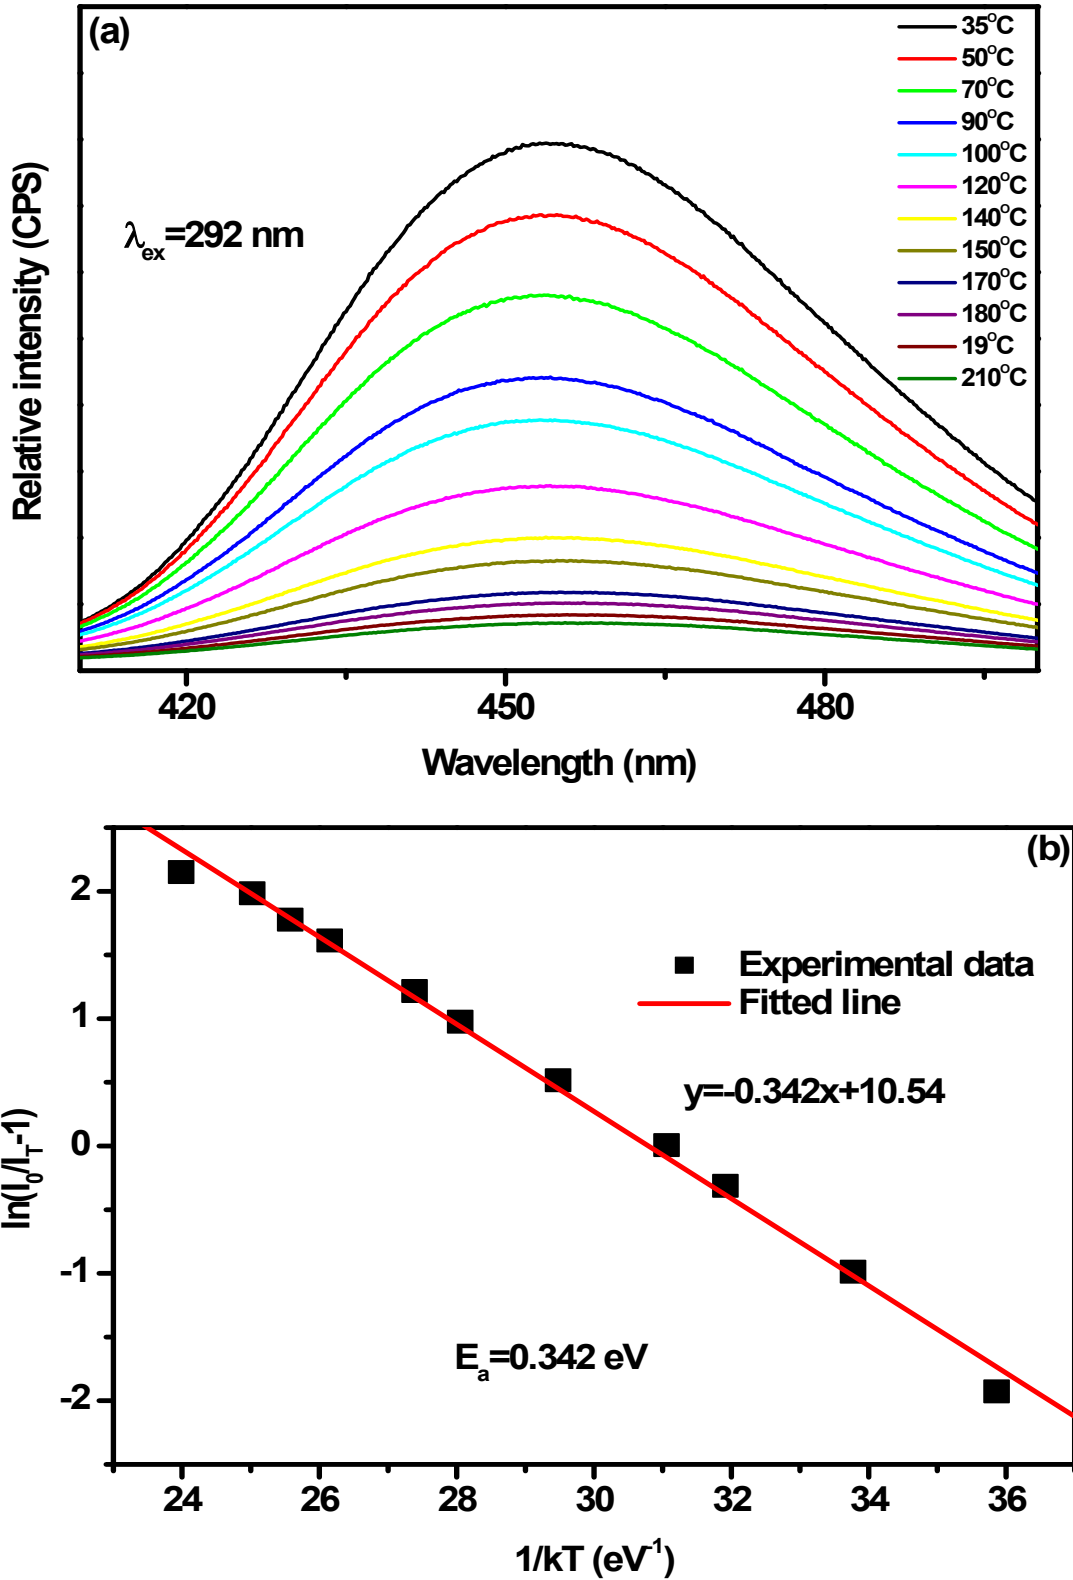

Fig. S4 (a) Temperature dependent emission spectra of SYNPF:0.005Eu<sup>2+</sup> ( $\lambda_{\text{ex}}=292$  nm); (b) The dependence of  $\ln[(I_0/I_T) - 1]$  on  $1/kT$ , (black dots are experimental data and red line is linear fitted result).

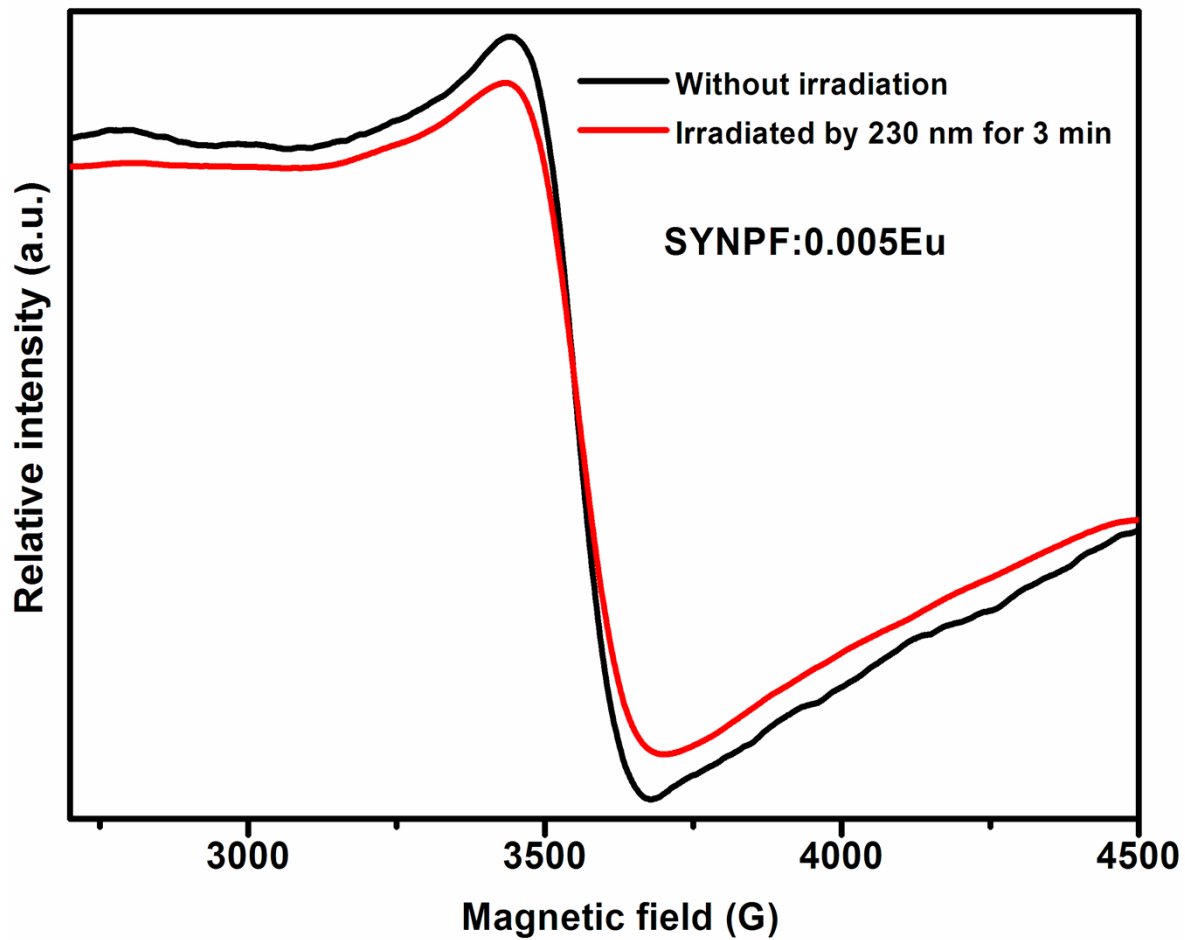

Fig. S5 EPR spectra of SYNPF:0.005Eu<sup>2+</sup> with and without irradiation by 230 nm for 3 min at room temperature (25 °C) in air atmosphere.
